Efficacy of anti-microbial gel vapours against aerosolised coronavirus, bacteria, and fungi

Parthasarathi Kalaiselvan, Muhammad Yasir, Mark Willcox, Ajay Kumar Vijay

School of Optometry and Vision Science, The University of New South Wales, Sydney, NSW 2052, Australia

**Corresponding author:**

Dr Ajay Kumar Vijay  
School of Optometry and Vision Science  
The University of New South Wales  
Level 3, Rupert Myers Building (North Wing)  
Gate 14 Barker Street  
Kensington  
NSW 2052  
Australia  
Tel: +612 93854503  
Email: v.ajaykumar@unsw.edu.au

**Running Title:** Antimicrobial vapours for microbial aerosols

**Keywords:** Aerosol, Coronavirus, SARS-CoV-2, Indoor Air, Antimicrobial, Essential oils

**Declaration of Interest:** None

## **SUMMARY:**

**Background:** The urban population spends up to 90% of their time indoors. The indoor environment harbours a diverse microbial population including viruses, bacteria, and fungi. Pathogens present in the indoor environment can be transmitted to humans through aerosols.

**Aim:** This study evaluated the efficacy of an antimicrobial gel containing a mix of essential oils against aerosols of bacteria, fungi, and coronavirus.

**Methods:** The antimicrobial gel was allowed to vapourize inside a glass chamber for 10 or 20 minutes. Microbial aerosols of *Escherichia coli*, *Aspergillus flavus* spores or murine hepatitis virus MHV 1, a surrogate of SARS CoV-2 was passed through the gel vapours and then collected on a 6-stage Andersen sampler. The number of viable microbes present in the aerosols collected in the different stages were enumerated and compared to number of viable microbes in control microbial aerosols that were not exposed to the gel vapours.

**Results:** Vaporizing the antimicrobial gel for 10 and 20 minutes resulted in a 48% ( $p = 0.002$  Vs. control) and 53% ( $p = 0.001$  Vs. control) reduction in the number of MHV-1 in the aerosols, respectively. The antimicrobial gel vaporised for 10 minutes, reduced the

number of viable *E. coli* by 51% ( $p = 0.032$  Vs. control) and *Aspergillus flavus* spores by 72% ( $p=0.008$  Vs. control) in the aerosols.

**Conclusions:** The antimicrobial gel may be able to reduce aerosol transmission of microbes.

**Keywords:** Aerosol, Coronavirus, SARS-CoV-2, Indoor Air, Antimicrobial, Essential oils

## INTRODUCTION

1 The majority of the urban population spend up to 90% of their time indoors [1, 2]. The  
2 indoor environment harbours a diverse microbial population including viruses, bacteria,  
3 fungi and protozoa [3-6] that is referred to as the indoor microbiome. A major  
4 component of indoor microbiome are endogenous microbes shed by human and  
5 animal occupants with a minor constituent being the transient microbiota of external  
6 environment transported inside [7]. Additional sources that can contribute to the indoor  
7 microbiome include water from indoor plumbing such as toilets and showers, soil,  
8 heating, and ventilation systems such as air-conditioning systems [4, 8-12]

9 Human exposure to the indoor microbiome has been recognised as a factor for the  
10 development of respiratory diseases and allergies. Pathogens present in the indoor  
11 microbiome can be transmitted to humans either through aerosols or from  
12 contaminated surfaces. Key pathogens that are transmitted through aerosols include  
13 the bacteria *Staphylococcus aureus* [13], *Mycobacterium tuberculosis* [14], the fungus  
14 *Aspergillus fumigatus* [15], and the viruses Influenza virus, Ebola and SARS-CoV [16].

15 While there was considerable speculation regarding the aerosol transmission of the  
16 SARS-CoV-2 virus [17, 18], current data confirms aerosol transmission of this virus [19,  
17 20].

18 Hospitals and food industries use UV-C irradiation, plasma air ionization and fumigation  
19 with disinfectants to reduce air borne pathogens in the indoor air [21, 22]. However,  
20 these strategies are expensive and may not be suitable in domestic settings. Portable  
21 indoor air cleaners/purifiers with HEPA filters are effective in reducing the microbial  
22 concentration in aerosols including SARS-CoV-2 in classrooms, offices, and hospitals  
23 [23-25]. Vapours of essential oils have good antimicrobial activity against respiratory  
24 pathogens [26, 27] and offer an alternative strategy for disinfecting the indoor air [28-  
25 30]. The vapours when dispersed in the air can significantly reduce the microbial levels  
26 indoors [31-33]. In this study we evaluated the antimicrobial efficacy of an antimicrobial  
27 gel containing a proprietary mix of essential oils for its activity against pathogenic  
28 bacteria, fungi, and a coronavirus surrogate of SARS-CoV-2.

29

## 30 MATERIALS AND METHODS

### 31 Microorganisms and their preparation

32 The mouse hepatitis virus (MHV-1) ATCC/VR261 is an enveloped single-strand RNA  
33 virus and an accepted surrogate of the SAR-CoV-2 virus. Viral stock was prepared by  
34 growing in A9 mouse fibroblast cells (ATCC/CCL 1.4) in Dulbecco's minimum essential  
35 medium (DMEM, Thermofisher, Macquarie Park, NSW, Australia) containing 10%  
36 foetal bovine serum (FBS; Thermofisher), 100 µg/ml streptomycin sulphate and 100  
37 I.U. penicillin G, (Thermofisher). Viral titres ( $1.0 \times 10^5$  to  $1.0 \times 10^6$  plaque forming units  
38 (PFU)/mL) were determined by plaque assay as described below.

39 *Escherichia coli* K12 (ATCC 10798) was grown overnight in tryptic soy broth (TSB; BD,  
40 Sydney, NSW, Australia) to mid-log phase. Following incubation, bacterial cells were  
41 collected by centrifuging and were washed once with phosphate buffer saline (PBS;  
42 NaCl 8 g/L, KCl 0.2g/L, Na<sub>2</sub>HPO<sub>4</sub> 1.15 g/L, KH<sub>2</sub>PO<sub>4</sub> 0.2 g/L, pH 7.4). Following  
43 washing, cells were re-suspended in PBS and the concentration adjusted  
44 spectrophotometrically to an optical density of 0.1 at 660 nm which yielded  $1.0 \times$   
45  $10^8$  colony forming units (CFU/mL) upon retrospective agar plate counts, then further  
46 serially diluted to a final concentration of  $1.0 \times 10^4$  CFU/mL.

47 The spores of *Aspergillus flavus* ATCC 9643 were produced by growth on Sabouraud  
48 dextrose agar (SDA; Thermofisher) for 10 days at 25°C. The fungal growth was  
49 suspended in sterile deionized water and filtered through sterile 70 µm filters to remove  
50 hyphal fragments. Spores were resuspended in sterile deionized water and their  
51 concentration adjusted spectrophotometrically to an optical density of 0.2 at 660 nm  
52 which yielded  $1.0 \times 10^6$  CFU/mL, which were then serially diluted to a final  
53 concentration of  $1.0 \times 10^4$  CFU/mL.

#### 54 **Antimicrobial Gel**

55 The antimicrobial gel (Mould Gone, SAN-AIR, West Gosford, NSW, Australia) was  
56 supplied in sealed containers. The gel formulation is proprietary but includes  
57 monoterpenoids, diterpenoids and sesquiterpenoids found in essential oils of plants  
58 from the *Melaleuca* genus (e.g., 1,8 cineole, thymol, alpha-pinene, caryophyllene) with  
59 an average dose of 0.0005% (v/v) when vapourised according to the manufacturer.

#### 60 **Activity of the antimicrobial gel against coronavirus in solution**

61 In order to demonstrate that the gel had antiviral activity, the first experiments  
62 incubated aliquots of the gel directly with viral particles in suspension. Cells of MHV-1  
63 ( $1.0 \times 10^5$  (PFU)/mL) were incubated with 25 mg or 50 mg of the antimicrobial gel in

64 DMEM at ambient temperature for 0.5 or 2 hours. Following incubation, the DMEM was  
65 removed, diluted in 20% (w/v) bovine serum albumin (BSA; Sigma-Aldrich, Castle Hill,  
66 NSW, Australia) prepared in PBS and incubated for 10-15 minutes to neutralize the  
67 antimicrobial agents released from the gel. Thereafter, 100  $\mu$ L aliquots were diluted  
68 ten-fold (in 20% BSA) and inoculated into the wells of 12 well plates containing A9 cells  
69 and incubated for 1 hour at 37 °C in the presence of 5% (v/v) CO<sub>2</sub>. The plates were  
70 gently rocked once every 15 minutes to prevent the cells from drying out. After  
71 incubation, an overlay media containing a 50:50 mix of 2% (w/v) agar (Sigma-Aldrich)  
72 and DMEM was added to each well and further incubated for 72 hours. Following  
73 incubation, the cells were fixed with 4% (v/v) formaldehyde (Sigma-Aldrich) for 2 –  
74 3 hours, the agar overlay removed, and the number of viral particles (PFUs) visualized  
75 after staining with 1% (w/v) crystal violet (Sigma-Aldrich). Controls were the viral  
76 inoculum incubated in DMEM or PBS without the antimicrobial gel. The percentage  
77 reduction in PFU for each quantity of the gel compared to the negative control (PBS)  
78 was calculated.

### 79 **Activity of the gel as vapours against viral aerosols**

80 As there are no standard assays for examining the effects of vapourised or aerosolised  
81 disinfectants on aerosols of microbial cells, a new assay was devised. A bacterial



82 filtration efficiency (BFE) test rig (CH Technologies, Westwood, NJ, USA) was used to  
83 produce viral aerosols (Figure 1). The antimicrobial gel (10 g) was removed from its  
84 container and allowed to vaporise into the glass aerosol chamber for 10 minutes or 20  
85 minutes prior to the introduction of the virus. The viral inoculum (50  $\mu$ L;  $1.0 \times 10^6$   
86 PFU/mL) was aerosolized using a continuous drive syringe pump through a nebulizer  
87 with an airflow of 28.3 L/min for one minute and allowed to interact with vapours of the  
88 antimicrobial gel as they passed through the glass tube. The size of the aerosols  
89 produced was approximately  $3.0 \pm 0.3 \mu$ m and these travelled through the glass  
90 aerosol chamber into an Anderson sieve sampler and were collected by flowing past  
91 2% (w/v) agar plates. The largest (7  $\mu$ m) sized aerosols were captured on the agar  
92 plate at the top of the Anderson sieve and the smallest (0.65  $\mu$ m) on the agar plate at  
93 the bottom of the device. After one minute, the airflow was stopped to cease aerosol  
94 generation, and the vacuum pump was run for further one minute to collect any  
95 residual aerosols from the glass chamber. Following this, agar plates were flooded with  
96 1.5 ml of either 20% BSA in DMEM (neutralised samples) or DMEM alone (non-  
97 neutralised samples), and viruses were carefully removed using a sterile cell scraper.  
98 Aliquots (100  $\mu$ L) from each plate were placed in duplicate on A9 cells in 12-well cell  
99 culture plates to culture any infectious viruses. The culture conditions were as

100 described above. Control runs were performed at the beginning of each experiment  
101 prior to the addition of the gel in the glass aerosol chamber to collect infectious viruses  
102 so that any reduction in the number of infectious viruses could be calculated as a  
103 percentage of this control. Test and control runs were conducted in duplicate and  
104 repeated twice.

#### 105 **Activity gel as vapours against bacterial and fungal spore aerosols**

106 The anti-bacterial activity of the gel vapourised for 10 minutes against *E. coli* and its  
107 sporicidal activity against *A. flavus* spores was determined using a similar method as  
108 described for MHV-1, except using 50  $\mu$ L of *E. coli* or *A. flavus* spores ( $1 \times 10^4$   
109 CFU/mL). Bacteria were collected on agar plates composed of tryptic soy agar (TSA;  
110 BD, Macquarie Park, NSW, Australia) alone or containing TSA and the neutralizers  
111 Tween® 80 (5 g/L) and lecithin (7 g/L). Fungal spores were collected on SDA plates  
112 alone or containing the same neutralizers. The numbers of viable cells from each of the  
113 6 plates in the Anderson sieve collector were enumerated following incubation at 37 °C  
114 for 24 hours for bacteria and at 25 °C for 72 hours for fungal spores. Control runs were  
115 conducted prior to the addition of the gel in the glass aerosol chamber to collect viable  
116 bacteria, and fungal spores. Test and control runs were performed in duplicate and  
117 repeated twice. The percentage of cells remaining viable after passage through the gel

118 vapours was calculated by comparing numbers in the absence (control) and presence  
119 (test) of the gel vapours.

## 120 **Statistical analysis**

121 Statistical analyses were performed using GraphPad Prism 7.04 software (GraphPad  
122 Software, La Jolla, CA, USA). The concentration and time dependent effect of the  
123 antimicrobial gel in solution was determined using two-way ANOVA. The effect of  
124 antimicrobial gel vapours at single time points on different aerosols sizes and overall  
125 percentage (%) reduction was assessed using Welch's t-test and one-way ANOVA with  
126 Tukey's test respectively. Statistical significance was set as  $P \leq 0.05$ .

127

## 128 **RESULTS**

### 129 **Activity of the gel in solution against coronavirus**

130 The antimicrobial gel when incubated in DMEM with the coronavirus reduced the  
131 numbers of infectious MHV-1 in solution in a dose dependent manner. The greatest  
132 quantity (50 mg) of the gel reduced the infectivity of the coronavirus by >99.99% (no  
133 viral cells were cultured) within 30 minutes of incubation compared to control ( $p <$   
134  $0.001$ ; Table I). The smaller quantity (25 mg) of the gel reduced the numbers of  
135 coronavirus by 98.6% after 30 minutes of incubation compared to control ( $p < 0.001$ ).

### 136 **Activity of the gel as vapours against viral aerosols**

137 The antimicrobial gel vapours were active against MHV-1 aerosols. The majority of the  
138 viral particles travelled in aerosols of 3.30 to 0.65  $\mu\text{m}$  in the absence of the gel (Figure  
139 2A) with most viral particles travelling in the 2.10 and 1.10  $\mu\text{m}$  aerosols (Figure 2A).  
140 After allowing the gel to vaporize in the chamber for 10 minutes, the numbers of viral  
141 particles that were able to infect the mouse cells were reduced for most aerosol sizes,  
142 with a significant reduction of 67% in the 1.10  $\mu\text{m}$  aerosol ( $p = 0.011$ ; Figure 2A). A  
143 slightly greater reduction of 78% was produced in the 2.10  $\mu\text{m}$  aerosols compared to  
144 the controls when the gel was allowed to vaporize for 20 minutes ( $p = 0.011$ ; Figure

145 2B). Overall, exposure of MHV-1 aerosols to the antimicrobial gel vapours (vaporized  
146 for 10 minutes) resulted a significant 48% reduction of all the aerosols sizes compared  
147 to untreated control ( $p = 0.002$ ; Table II). Allowing the antimicrobial gel to vaporize for  
148 20 minutes, resulted in a 53% reduction in the number of viable aerosolized viral  
149 particles of all sizes compared to control ( $p = 0.001$ ; Table II). Following neutralization  
150 with 20% BSA, the activity of the antimicrobial gel was slightly but not significantly ( $p =$   
151  $0.078$ ; Table II) reduced, resulting in a 33% reduction in the viability of viral aerosols  
152 compared to control ( $p = 0.001$ ; Table II).

### 153 **Activity against aerosols of bacteria or fungal spores**

154 The antimicrobial gel in vaporized form was active against aerosols of *E. coli*. In the  
155 absence of antimicrobial gel, this bacterium mostly travelled in aerosol particle sizes  
156 between 3.30 to 1.10  $\mu\text{m}$  (Figure 3). Overall, the antimicrobial gel produced a reduction  
157 in bacterial viability of 29% ( $p = 0.018$ ) when neutralised during bacterial growth and  
158 51% ( $p = 0.032$ ) when not neutralised during bacterial growth (Table III). Without  
159 neutralising the gel during bacterial growth, the antimicrobial gel reduced the number  
160 of live bacteria in the 3.30, 2.10 and 1.10  $\mu\text{m}$  aerosols by 76%, 69% and 64%,  
161 respectively ( $p = 0.001$ ).

162 Similarly, the antimicrobial gel vapours were also active against aerosols of *Aspergillus*

163 *flavus* spores. The spores mainly travelled in aerosols of between 7.00  $\mu\text{m}$  to 2.10  $\mu\text{m}$ ,  
164 with significantly ( $p < 0.001$ ) higher numbers in 2.10  $\mu\text{m}$  than other aerosols sizes  
165 (Figure 4). No spores travelled in aerosols of 1.10  $\mu\text{m}$  or 0.65  $\mu\text{m}$  (Figure 4). Overall,  
166 the antimicrobial gel reduced the viability of spores of *Aspergillus flavus* by 72% in non-  
167 neutralised conditions and 67% when neutralised ( $p \leq 0.008$ ; Table IV). Following  
168 exposure to the gel, the number of spores in aerosols of 2.10  $\mu\text{m}$  was reduced  
169 compared to control by 60% and 73% in neutralised and non-neutralised conditions,  
170 respectively ( $p=0.001$ ). There was no significant difference of the activity if the  
171 antimicrobial gel was neutralised or not when growing *Aspergillus flavus* spores ( $p \leq$   
172 0.08).  
173

174 **DISCUSSION:**

175 This study has demonstrated that the Mould Gone gel (San-Air) containing compounds  
176 found in essential oils of *Melaleuca* genus plants has good antimicrobial activity against  
177 bacteria, fungal spores, and coronavirus. Direct contact with the gel resulted in a  
178 complete kill of the virus. The gel vapours were able to reduce the numbers of the  
179 coronavirus MHV-1 and the bacterium *E. coli* by  $\geq 50\%$  and the reduce the number of  
180 *A. flavus* spores that can germinate by  $\geq 66\%$ . The ability of vapourised gels to prevent  
181 the growth of bacteria, fungal spores and reduce the infectivity of coronavirus in  
182 aerosols has not been previously demonstrated, as far as the authors can tell.

183 This study used a ready-made bacterial filtration efficiency testing rig that is usually  
184 used to assess the ability of face masks to filter the bacterium *Staphylococcus aureus*  
185 as specified by standard ASTM F2101-1[34]. The Andersen impactor has been widely  
186 used to sample environmental bacteria and fungi [35] and has the advantage of being  
187 able to directly capture the biological aerosols on agar plates which can then be  
188 incubated to directly culture the organisms. Neutralizing chemicals can also be  
189 incorporated into the agar to inactivate antimicrobial agents present in the aerosols.

190 While viruses can be captured on the agar plates, they had to be recovered from the  
191 agar and cultured on susceptible cells. Other researchers have used this method to

192 culture virus in aerosols [36, 37]. A major advantage of the Andersen impactor is that it  
193 allows differentiation of the size of the aerosols in which microbes travel [38].

194 Human activities such as speaking, coughing and sneezing generate microbial  
195 aerosols in sizes ranging from  $<1 \mu\text{m}$  to  $>100 \mu\text{m}$  [39-42]. Larger aerosols or droplets  
196 remain airborne for a short time and settle close to the source [43]. Smaller aerosols  
197 under  $5 \mu\text{m}$  in size can remain airborne for longer periods and are able to make their  
198 way to the lungs [44]. Aerosols of this size are implicated in the airborne transmission  
199 of *Mycobacterium tuberculosis* [45], *Aspergillus fumigatus* spores [46], and viruses  
200 including the influenza virus [47] and SARS CoV [48].

201 The number of viral copies that are needed to cause an infection is expressed as  $\text{ID}_{50}$   
202 which denotes the mean dose that causes an infection in 50% of susceptible subjects.

203 While the  $\text{ID}_{50}$  for SARS-CoV-2 is not known, the  $\text{ID}_{50}$  for SARS CoV ranged from 16 to  
204 160 PFU/person [49]. The vapours produced by the antimicrobial gel were able to  
205 significantly reduce the number of viable viral particles in aerosols under  $5 \mu\text{m}$  by 48%  
206 within 10 minutes and the reduction increased to 53% when the gel was allowed to  
207 vaporise for 20 minutes indicating sustained and perhaps increasing antimicrobial  
208 activity. Allowing the gel to vapourize for longer durations and reducing the air flow (i.e.,



209 increasing the time for the virus and vapour to interact) may result in further reductions

210 in viral numbers and this should be tested in future experiments.

211 The gel vapours were bacteriostatic as their activity was diminished in the presence of

212 agents that neutralized their antimicrobial compounds while the viral and fungal activity

213 was unaffected by neutralizers. The active compounds present in the antimicrobial gel

214 used in this study concentrate to approximately 0.0005% (v/v) on evaporation (data

215 supplied by the manufacturer). In-vitro studies performed using essential oils have shown

216 that the active compounds in essential oils are bactericidal for *E. coli* at higher

217 concentrations and bacteriostatic at lower concentrations [50]. Essential oil vapours

218 can affect spore formation in *A. fumigatus* [51] and can be either fungistatic or

219 fungicidal depending on the active compound [52]. Very few studies have examined the

220 antiviral efficacy of essential oil vapours against viruses. One study reported that

221 aerosolised influenza virus or bacteriophage M13 exposed to vapourised essential oils

222 of tea tree or eucalyptus for 24 hours. This resulted in approximately 87% reduction in

223 influenza viral titres, but only 25-42% reduction in M13 titres [27]. Bioactive compounds

224 are present in the essential oils at significantly greater concentration compared to the

225 antimicrobial gel used in this study, and there are concerns about the impact of

226 vapouring these indoor and their impact on human occupants [53]. The low

227 concentration of the active compounds present in the antimicrobial gel are unlikely to

228 impact human health.

229 This study has demonstrated that vapours produced by a gel containing naturally

230 occurring active compounds can significantly reduce the viable numbers of aerosolized

231 microbes including coronavirus. Using the gel may reduce the transmission of

232 respiratory pathogens, improve indoor air quality and health of human occupants.

233    **REFERENCES**

- 234    [1]    Klepeis NE, Nelson WC, Ott WR, Robinson JP, Tsang AM, Switzer P, et al. The  
235    National Human Activity Pattern Survey (NHAPS): a resource for assessing exposure  
236    to environmental pollutants. *J Expo Anal Environ Epidemiol* 2001;11(3):231-52.  
237    <https://doi.org/10.1038/sj.jea.7500165>.
- 238    [2]    Höppe P, Martinac I. Indoor climate and air quality. Review of current and future  
239    topics in the field of ISB study group 10. *Int J Biometeorol* 1998;42(1):1-7.  
240    <https://doi.org/10.1007/s004840050075>.
- 241    [3]    Prussin AJ, 2nd, Garcia EB, Marr LC. Total Virus and Bacteria Concentrations  
242    in Indoor and Outdoor Air. *Environ Sci Technol Lett* 2015;2(4):84-8.  
243    <https://doi.org/10.1021/acs.estlett.5b00050>.
- 244    [4]    Gilbert JA, Stephens B. Microbiology of the built environment. *Nat Rev*  
245    *Microbiol* 2018;16(11):661-70. <https://doi.org/10.1038/s41579-018-0065-5>.
- 246    [5]    Adams RI, Miletto M, Taylor JW, Bruns TD. The diversity and distribution of  
247    fungi on residential surfaces. *PLoS One* 2013;8(11):e78866.  
248    <https://doi.org/10.1371/journal.pone.0078866>.
- 249    [6]    Adams RI, Miletto M, Lindow SE, Taylor JW, Bruns TD. Airborne bacterial  
250    communities in residences: similarities and differences with fungi. *PLoS One*  
251    2014;9(3):e91283. <https://doi.org/10.1371/journal.pone.0091283>.
- 252    [7]    Prussin AJ, 2nd, Marr LC. Sources of airborne microorganisms in the built  
253    environment. *Microbiome* 2015;3(1):78. <https://doi.org/10.1186/s40168-015-0144-z>.
- 254    [8]    Meadow JF, Altrichter AE, Kembel SW, Kline J, Mhuireach G, Moriyama M, et  
255    al. Indoor airborne bacterial communities are influenced by ventilation, occupancy, and  
256    outdoor air source. *Indoor Air* 2014;24(1):41-8. <https://doi.org/10.1111/ina.12047>.
- 257    [9]    Kelley ST, Gilbert JA. Studying the microbiology of the indoor environment.  
258    *Genome Biol* 2013;14(2):202. <https://doi.org/10.1186/gb-2013-14-2-202>.
- 259    [10]   Leung MH, Lee PK. The roles of the outdoors and occupants in contributing to a  
260    potential pan-microbiome of the built environment: a review. *Microbiome* 2016;4(1):21.  
261    <https://doi.org/10.1186/s40168-016-0165-2>.
- 262    [11]   Adams RI, Bhangar S, Pasut W, Arens EA, Taylor JW, Lindow SE, et al.  
263    Chamber bioaerosol study: outdoor air and human occupants as sources of indoor  
264    airborne microbes. *PLoS One* 2015;10(5):e0128022.  
265    <https://doi.org/10.1371/journal.pone.0128022>.

- 266 [12] Kettleson EM, Adhikari A, Vesper S, Coombs K, Indugula R, Reponen T. Key  
267 determinants of the fungal and bacterial microbiomes in homes. *Environ Res*  
268 2015;138:130-5. <https://doi.org/10.1016/j.envres.2015.02.003>.
- 269 [13] Dancer SJ. Importance of the environment in meticillin-resistant *Staphylococcus*  
270 *aureus* acquisition: the case for hospital cleaning. *The Lancet Infectious Diseases*  
271 2008;8(2):101-13. [https://doi.org/https://doi.org/10.1016/S1473-3099\(07\)70241-4](https://doi.org/https://doi.org/10.1016/S1473-3099(07)70241-4).
- 272 [14] Clark SO, Hall Y, Kelly DL, Hatch GJ, Williams A. Survival of *Mycobacterium*  
273 *tuberculosis* during experimental aerosolization and implications for aerosol challenge  
274 models. *J Appl Microbiol* 2011;111(2):350-9. [https://doi.org/10.1111/j.1365-](https://doi.org/10.1111/j.1365-2672.2011.05069.x)  
275 [2672.2011.05069.x](https://doi.org/10.1111/j.1365-2672.2011.05069.x).
- 276 [15] McCormick A, Loeffler J, Ebel F. *Aspergillus fumigatus*: contours of an  
277 opportunistic human pathogen. *Cell Microbiol* 2010;12(11):1535-43.  
278 <https://doi.org/10.1111/j.1462-5822.2010.01517.x>.
- 279 [16] Jones RM, Brosseau LM. Aerosol transmission of infectious disease. *J Occup*  
280 *Environ Med* 2015;57(5):501-8. <https://doi.org/10.1097/JOM.0000000000000448>.
- 281 [17] Jayaweera M, Perera H, Gunawardana B, Manatunge J. Transmission of  
282 COVID-19 virus by droplets and aerosols: A critical review on the unresolved  
283 dichotomy. *Environmental Research* 2020;188:109819.  
284 <https://doi.org/https://doi.org/10.1016/j.envres.2020.109819>.
- 285 [18] Asadi S, Bouvier N, Wexler AS, Ristenpart WD. The coronavirus pandemic and  
286 aerosols: Does COVID-19 transmit via expiratory particles? *Aerosol Sci Technol*  
287 2020;0(0):1-4. <https://doi.org/10.1080/02786826.2020.1749229>.
- 288 [19] Meyerowitz EA, Richterman A, Gandhi RT, Sax PE. Transmission of SARS-  
289 CoV-2: A Review of Viral, Host, and Environmental Factors. *Ann Intern Med*  
290 2021;174(1):69-79. <https://doi.org/10.7326/m20-5008>.
- 291 [20] MacIntyre CR, Ananda-Rajah MR. Scientific evidence supports aerosol  
292 transmission of SARS-COV-2. *Antimicrob Resist Infect Control* 2020;9(1):202.  
293 <https://doi.org/10.1186/s13756-020-00868-6>.
- 294 [21] Ijaz MK, Zargar B, Wright KE, Rubino JR, Sattar SA. Generic aspects of the  
295 airborne spread of human pathogens indoors and emerging air decontamination  
296 technologies. *Am J Infect Control* 2016;44(9 Suppl):S109-20.  
297 <https://doi.org/10.1016/j.ajic.2016.06.008>.
- 298 [22] Oliveira M, Tiwari BK, Duffy G. Emerging Technologies for Aerial  
299 Decontamination of Food Storage Environments to Eliminate Microbial Cross-  
300 Contamination. *Foods* 2020;9(12). <https://doi.org/10.3390/foods9121779>.

- 301 [23] Bischoff W, Russell G, Willard E, Stehle J, Jr. Impact of a novel mobile high-  
302 efficiency particulate air-ultraviolet air recirculation system on the bacterial air burden  
303 during routine care. *Am J Infect Control* 2019;47(8):1025-7.  
304 <https://doi.org/10.1016/j.ajic.2018.12.019>.
- 305 [24] Curtius J, Granzin M, Schrod J. Testing mobile air purifiers in a school  
306 classroom: Reducing the airborne transmission risk for SARS-CoV-2. *Aerosol Science*  
307 *and Technology* 2021;55(5):586-99. <https://doi.org/10.1080/02786826.2021.1877257>.
- 308 [25] Guo J, Xiong Y, Kang T, Xiang Z, Qin C. Bacterial community analysis of floor  
309 dust and HEPA filters in air purifiers used in office rooms in ILAS, Beijing. *Sci Rep*  
310 2020;10(1):6417. <https://doi.org/10.1038/s41598-020-63543-1>.
- 311 [26] Inouye S, Takizawa T, Yamaguchi H. Antibacterial activity of essential oils and  
312 their major constituents against respiratory tract pathogens by gaseous contact. *J*  
313 *Antimicrob Chemother* 2001;47(5):565-73. <https://doi.org/10.1093/jac/47.5.565>.
- 314 [27] Usachev EV, Pyankov OV, Usacheva OV, Agranovski IE. Antiviral activity of tea  
315 tree and eucalyptus oil aerosol and vapour. *Journal of Aerosol Science* 2013;59:22-30.  
316 <https://doi.org/10.1016/j.jaerosci.2013.01.004>.
- 317 [28] Karpinski TM. Essential Oils of Lamiaceae Family Plants as Antifungals.  
318 *Biomolecules* 2020;10(1). <https://doi.org/10.3390/biom10010103>.
- 319 [29] Maczka W, Duda-Madej A, Gorny A, Grabarczyk M, Winska K. Can Eucalyptol  
320 Replace Antibiotics? *Molecules* 2021;26(16).  
321 <https://doi.org/10.3390/molecules26164933>.
- 322 [30] Sharifi-Rad J, Salehi B, Varoni EM, Sharopov F, Yousaf Z, Ayatollahi SA, et al.  
323 Plants of the Melaleuca Genus as Antimicrobial Agents: From Farm to Pharmacy.  
324 *Phytother Res* 2017;31(10):1475-94. <https://doi.org/10.1002/ptr.5880>.
- 325 [31] Sato K, Krist S, Buchbauer G. Antimicrobial effect of vapours of geraniol, (R)-(-  
326 )-linalool, terpineol,  $\gamma$ -terpinene and 1,8-cineole on airborne microbes using an  
327 airwasher. *Flavour and Fragrance Journal* 2007;22(5):435-7.  
328 <https://doi.org/10.1002/ffj.1818>.
- 329 [32] Lanzerstorfer A, Hackl M, Schlomer M, Rest B, Deutsch-Grasl E, Lanzerstorfer  
330 C. The influence of air-dispersed essential oils from lemon (*Citrus limon*) and silver fir  
331 (*Abies alba*) on airborne bacteria and fungi in hospital rooms. *J Environ Sci Health A*  
332 *Tox Hazard Subst Environ Eng* 2019;54(3):256-60.  
333 <https://doi.org/10.1080/10934529.2018.1546498>.
- 334 [33] Gelmini F, Belotti L, Vecchi S, Testa C, Beretta G. Air dispersed essential oils  
335 combined with standard sanitization procedures for environmental microbiota control in

- 336 nosocomial hospitalization rooms. *Complement Ther Med* 2016;25:113-9.  
337 <https://doi.org/10.1016/j.ctim.2016.02.004>.
- 338 [34] [www.astm.org](http://www.astm.org). Standard Test Method for Evaluating the Bacterial Filtration  
339 Efficiency (BFE) of Medical Face Mask Materials, Using a Biological Aerosol of  
340 *Staphylococcus aureus*. West Conshohocken, PA: ASTM International; 2019:5.
- 341 [35] Xu Z, Yao M. Monitoring of bioaerosol inhalation risks in different environments  
342 using a six-stage Andersen sampler and the PCR-DGGE method. *Environ Monit*  
343 *Assess* 2013;185(5):3993-4003. <https://doi.org/10.1007/s10661-012-2844-1>.
- 344 [36] Kutter JS, de Meulder D, Bestebroer TM, Mulders A, Fouchier RAM, Herfst S.  
345 Comparison of three air samplers for the collection of four nebulized respiratory viruses  
346 - Collection of respiratory viruses from air. *Indoor Air* 2021.  
347 <https://doi.org/10.1111/ina.12875>.
- 348 [37] Zhao Y, Aarnink AJ, Wang W, Fabri T, Groot Koerkamp PW, de Jong MC.  
349 Airborne virus sampling: Efficiencies of samplers and their detection limits for infectious  
350 bursal disease virus (IBDV). *Ann Agric Environ Med* 2014;21(3):464-71.  
351 <https://doi.org/10.5604/12321966.1120585>.
- 352 [38] Andersen AA. New sampler for the collection, sizing, and enumeration of viable  
353 airborne particles. *J Bacteriol* 1958;76(5):471-84. [https://doi.org/10.1128/jb.76.5.471-](https://doi.org/10.1128/jb.76.5.471-484.1958)  
354 [484.1958](https://doi.org/10.1128/jb.76.5.471-484.1958).
- 355 [39] Morawska L, Johnson GR, Ristovski ZD, Hargreaves M, Mengersen K, Corbett  
356 S, et al. Size distribution and sites of origin of droplets expelled from the human  
357 respiratory tract during expiratory activities. *Journal of Aerosol Science* 2009;40(3):256-  
358 69. <https://doi.org/10.1016/j.jaerosci.2008.11.002>.
- 359 [40] Chao CYH, Wan MP, Morawska L, Johnson GR, Ristovski ZD, Hargreaves M,  
360 et al. Characterization of expiration air jets and droplet size distributions immediately at  
361 the mouth opening. *J Aerosol Sci* 2009;40(2):122-33.  
362 <https://doi.org/10.1016/j.jaerosci.2008.10.003>.
- 363 [41] Johnson GR, Morawska L, Ristovski ZD, Hargreaves M, Mengersen K, Chao  
364 CYH, et al. Modality of human expired aerosol size distributions. *Journal of Aerosol*  
365 *Science* 2011;42(12):839-51. <https://doi.org/10.1016/j.jaerosci.2011.07.009>.
- 366 [42] Papineni RS, Rosenthal FS. The size distribution of droplets in the exhaled  
367 breath of healthy human subjects. *J Aerosol Med* 1997;10(2):105-16.  
368 <https://doi.org/10.1089/jam.1997.10.105>.
- 369 [43] Xie X, Li Y, Chwang AT, Ho PL, Seto WH. How far droplets can move in indoor  
370 environments--revisiting the Wells evaporation-falling curve. *Indoor Air* 2007;17(3):211-  
371 25. <https://doi.org/10.1111/j.1600-0668.2007.00469.x>.

- 372 [44] Owen MK, Ensor DS, Sparks LE. Airborne particle sizes and sources found in  
373 indoor air. *Atmospheric Environment Part A General Topics* 1992;26(12):2149-62.  
374 [https://doi.org/10.1016/0960-1686\(92\)90403-8](https://doi.org/10.1016/0960-1686(92)90403-8).
- 375 [45] Cole EC, Cook CE. Characterization of infectious aerosols in health care  
376 facilities: an aid to effective engineering controls and preventive strategies. *Am J Infect*  
377 *Control* 1998;26(4):453-64. [https://doi.org/10.1016/s0196-6553\(98\)70046-x](https://doi.org/10.1016/s0196-6553(98)70046-x).
- 378 [46] Morris G, Kokki MH, Anderson K, Richardson MD. Sampling of *Aspergillus*  
379 spores in air. *J Hosp Infect* 2000;44(2):81-92. <https://doi.org/10.1053/jhin.1999.0688>.
- 380 [47] Alford RH, Kasel JA, Gerone PJ, Knight V. Human influenza resulting from  
381 aerosol inhalation. *Proc Soc Exp Biol Med* 1966;122(3):800-4.  
382 <https://doi.org/10.3181/00379727-122-31255>.
- 383 [48] Tang JW, Wilson P, Shetty N, Noakes CJ. Aerosol-Transmitted Infections-a  
384 New Consideration for Public Health and Infection Control Teams. *Curr Treat Options*  
385 *Infect Dis* 2015;7(3):176-201. <https://doi.org/10.1007/s40506-015-0057-1>.
- 386 [49] Watanabe T, Bartrand TA, Weir MH, Omura T, Haas CN. Development of a  
387 dose-response model for SARS coronavirus. *Risk Anal* 2010;30(7):1129-38.  
388 <https://doi.org/10.1111/j.1539-6924.2010.01427.x>.
- 389 [50] Puvaca N, Milenkovic J, Galonja Coghil T, Bursic V, Petrovic A, Tanaskovic S,  
390 et al. Antimicrobial Activity of Selected Essential Oils against Selected Pathogenic  
391 Bacteria: In Vitro Study. *Antibiotics (Basel)* 2021;10(5).  
392 <https://doi.org/10.3390/antibiotics10050546>.
- 393 [51] Inouye S, Watanabe M, Nishiyama Y, Takeo K, Akao M, Yamaguchi H.  
394 Antisporulating and respiration-inhibitory effects of essential oils on filamentous fungi.  
395 *Mycoses* 1998;41(9-10):403-10. <https://doi.org/10.1111/j.1439-0507.1998.tb00361.x>.
- 396 [52] Inouye S, Tsuruoka T, Watanabe M, Takeo K, Akao M, Nishiyama Y, et al.  
397 Inhibitory effect of essential oils on apical growth of *Aspergillus fumigatus* by vapour  
398 contact. *Mycoses* 2000;43(1-2):17-23. <https://doi.org/10.1046/j.1439-0507.2000.00538.x>.
- 400 [53] Angulo Milhem S, Verrielle M, Nicolas M, Thevenet F. Does the ubiquitous use  
401 of essential oil-based products promote indoor air quality? A critical literature review.  
402 *Environ Sci Pollut Res Int* 2020;27(13):14365-411. <https://doi.org/10.1007/s11356-020-08150-3>.
- 403

404

405 **Table I:** Effect of different concentrations of antimicrobial gel against coronavirus MHV-  
406 1 in solution at different time points.

| Sample            | Amount of gel (mg) | Incubation time (minutes) | Number of plaques (PFU/mL) | Log <sub>10</sub> reduction | % Reduction | P-value |
|-------------------|--------------------|---------------------------|----------------------------|-----------------------------|-------------|---------|
| Control           | -                  | -                         | 26750 ± 1658               | -                           | -           |         |
| Antimicrobial gel | 25                 | 30                        | 375 ± 35                   | 1.9                         | 98.60       | <0.001  |
|                   | 25                 | 120                       | 225 ± 177                  | 2.1                         | 99.16       | < 0.001 |
|                   | 50                 | 30                        | 0 ± 0                      | 4.4                         | 99.99       | < 0.001 |
|                   | 50                 | 120                       | 0 ± 0                      | 4.4                         | 99.99       | <0.001  |

407

408



409 **Table II:** The ability of antimicrobial gel vapourised for 10 and 20 minutes to reduce the  
410 numbers of aerosolised coronavirus MHV-1.

| Sample                               | Amount of gel (g) | Evaporation time (minutes) | Number of plaques (PFU/mL) | Log <sub>10</sub> reduction | % Reduction | p-value |
|--------------------------------------|-------------------|----------------------------|----------------------------|-----------------------------|-------------|---------|
| Control                              | -                 | -                          | 1152 ± 354                 | -                           | -           |         |
| Antimicrobial gel (No neutraliser)   | 10                | 10                         | 596 ± 149                  | 0.3                         | 48.26       | 0.002   |
| Control                              | -                 | -                          | 1396 ± 240                 | -                           | -           |         |
| Antimicrobial gel (No neutraliser)   | 10                | 20                         | 650 ± 101                  | 0.3                         | 53.44       | 0.001   |
| Antimicrobial gel (With neutraliser) | 10                | 20                         | 930± 142                   | 0.2                         | 33.48       | 0.001   |

411

412

413 **Table III:** The ability of antimicrobial gel vapourised for 10 minutes to reduce the  
414 numbers of aerosolised *E. coli* K12.

| Sample                               | Amount of gel (g) | Evaporation time (minutes) | Number of bacteria (CFU/mL) | Log <sub>10</sub> reduction | % Reduction | p-Value |
|--------------------------------------|-------------------|----------------------------|-----------------------------|-----------------------------|-------------|---------|
| Control (no neutraliser)             | -                 | -                          | 86 ± 14                     | -                           | -           | -       |
| Antimicrobial gel (No neutraliser)   | 10                | 10                         | 42 ± 20                     | 0.3                         | 51.16       | 0.001   |
| Control (With neutraliser)           | -                 | -                          | 139 ± 46                    | -                           | -           | -       |
| Antimicrobial gel (With neutraliser) | 10                | 10                         | 99 ± 47                     | 0.1                         | 28.77       | 0.018   |

415

416

417 **Table IV:** The ability of the antimicrobial gel vapourised for 10 minutes to reduce the  
418 numbers of aerosolised *A. flavus* spores.

| Sample                               | Amount of gel (g) | Evaporation time (minutes) | Number of fungal spores (CFU/mL) | Log <sub>10</sub> Reduction | % Reduction | p-Value |
|--------------------------------------|-------------------|----------------------------|----------------------------------|-----------------------------|-------------|---------|
| Control (No neutralizer)             | -                 | -                          | 231 ± 42                         |                             |             |         |
| Antimicrobial gel (No neutralizer)   | 10                | 10                         | 65 ± 7                           | 0.6                         | 71.86       | 0.008   |
| Control (With neutralizer)           | -                 | -                          | 170 ± 77                         | -                           | -           |         |
| Antimicrobial gel (With neutralizer) | 10                | 10                         | 57 ± 23                          | 0.5                         | 66.47       | 0.001   |

419

420

421 **FIGURE LEGENDS:**

422 **Figure 1:** The Bacterial Filtration Efficiency Rig containing an Anderson sieve sampler.

423 Aerosols of  $3.0 \pm 0.3 \mu\text{m}$  on average of viruses, bacteria or fungal spores were produced in  
424 the glass chamber.

425 **Figure 2:** Number of murine hepatitis virus (MHV-1) recovered from different aerosol  
426 sizes with or without neutralization of the gel vaporized for 10 minutes (A) or 20  
427 minutes (B). The antimicrobial gel significantly reduced the ability of viral aerosols to  
428 infect A9 cells in aerosols sizes of 2.10 and 1.10  $\mu\text{m}$  compared to untreated control  
429 ( $p \leq 0.001$ ). Data points represent the mean ( $\pm$  95% confidence interval) of three  
430 independent experiments.

431 **Figure 3:** Numbers of *E. coli* K12 recovered from different aerosol sizes with or without  
432 neutralisation of the gel vapourised for 10 minutes. The gel significantly reduced the  
433 viability of bacteria in aerosols sizes 3.30 and 2.10  $\mu\text{m}$  when neutralised or non-  
434 neutralised during bacterial growth compared to untreated control ( $p < 0.05$ ). Data  
435 points represent the mean ( $\pm$  95% confidence interval) of three independent  
436 experiments.

437 **Figure 4.** Number of *A. flavus* spores recovered from different aerosol sizes with or  
438 without neutralisation of the gel vapourised for 10 minutes. The antimicrobial gel  
439 significantly reduced the viability of spores of *A. flavus* in aerosols sizes 3.30 and 2.10  
440  $\mu\text{m}$  in both neutralised and non-neutralised condition compared to untreated control ( $p$   
441  $< 0.05$ ). Data points represent the mean ( $\pm$  95% confidence interval) of three  
442 independent experiments.

443 **Funding Information:** This research was supported by San-Air, NSW, Australia.

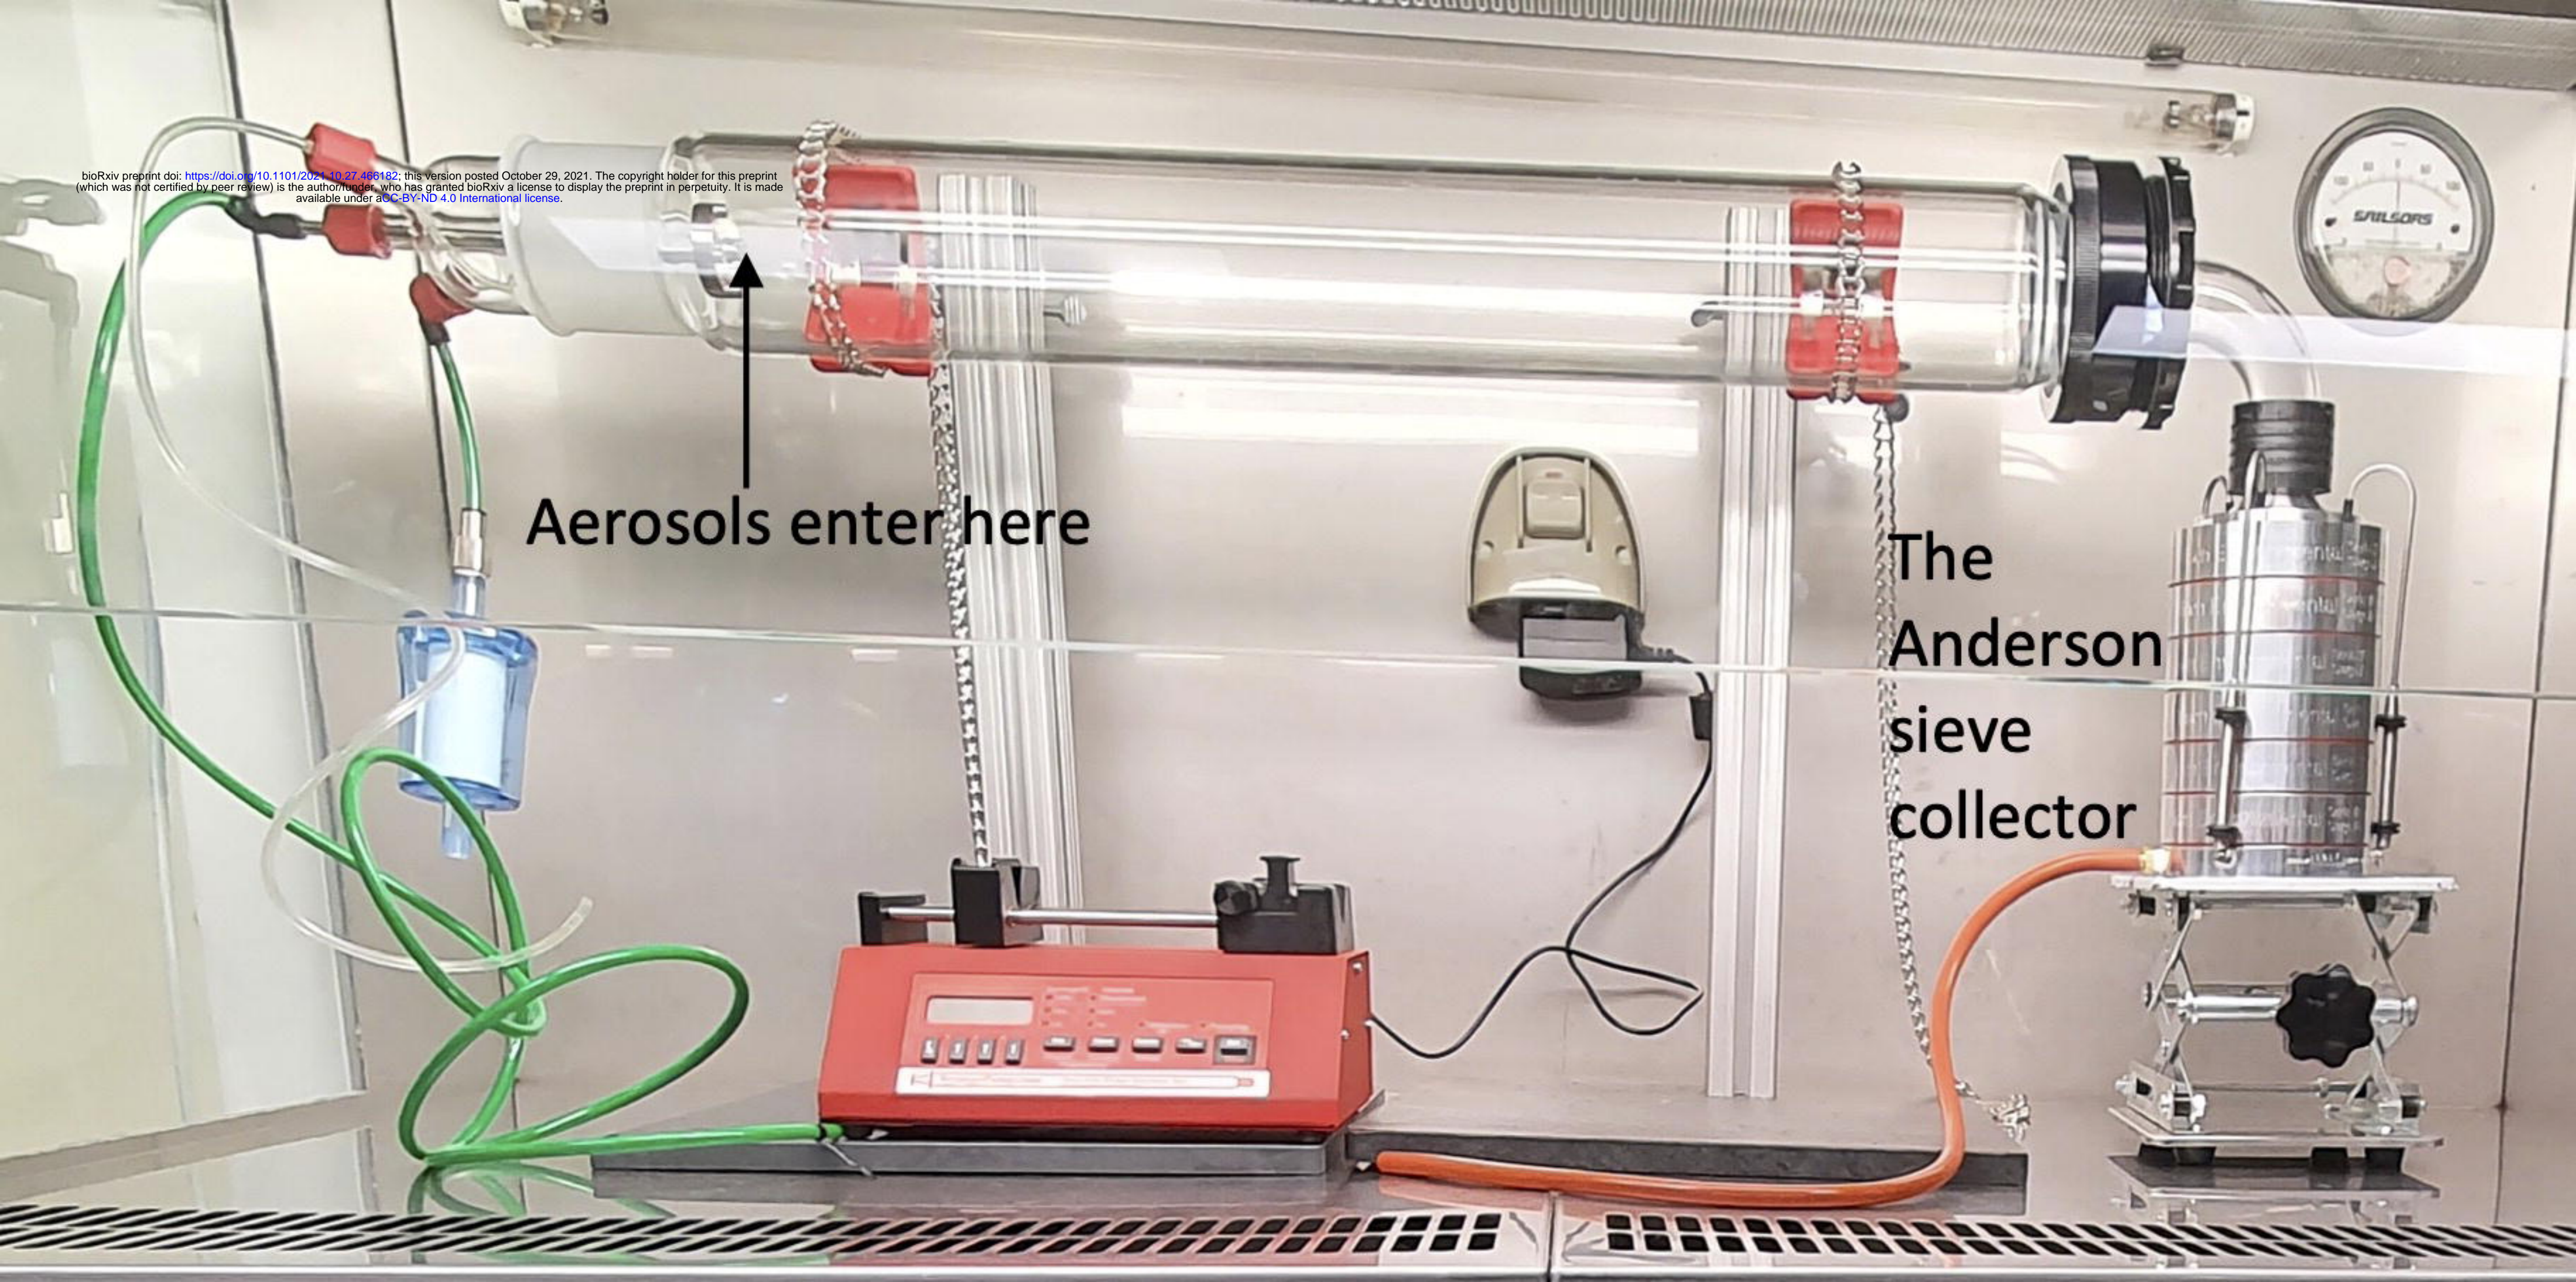

Aerosols enter here

The  
Anderson  
sieve  
collector

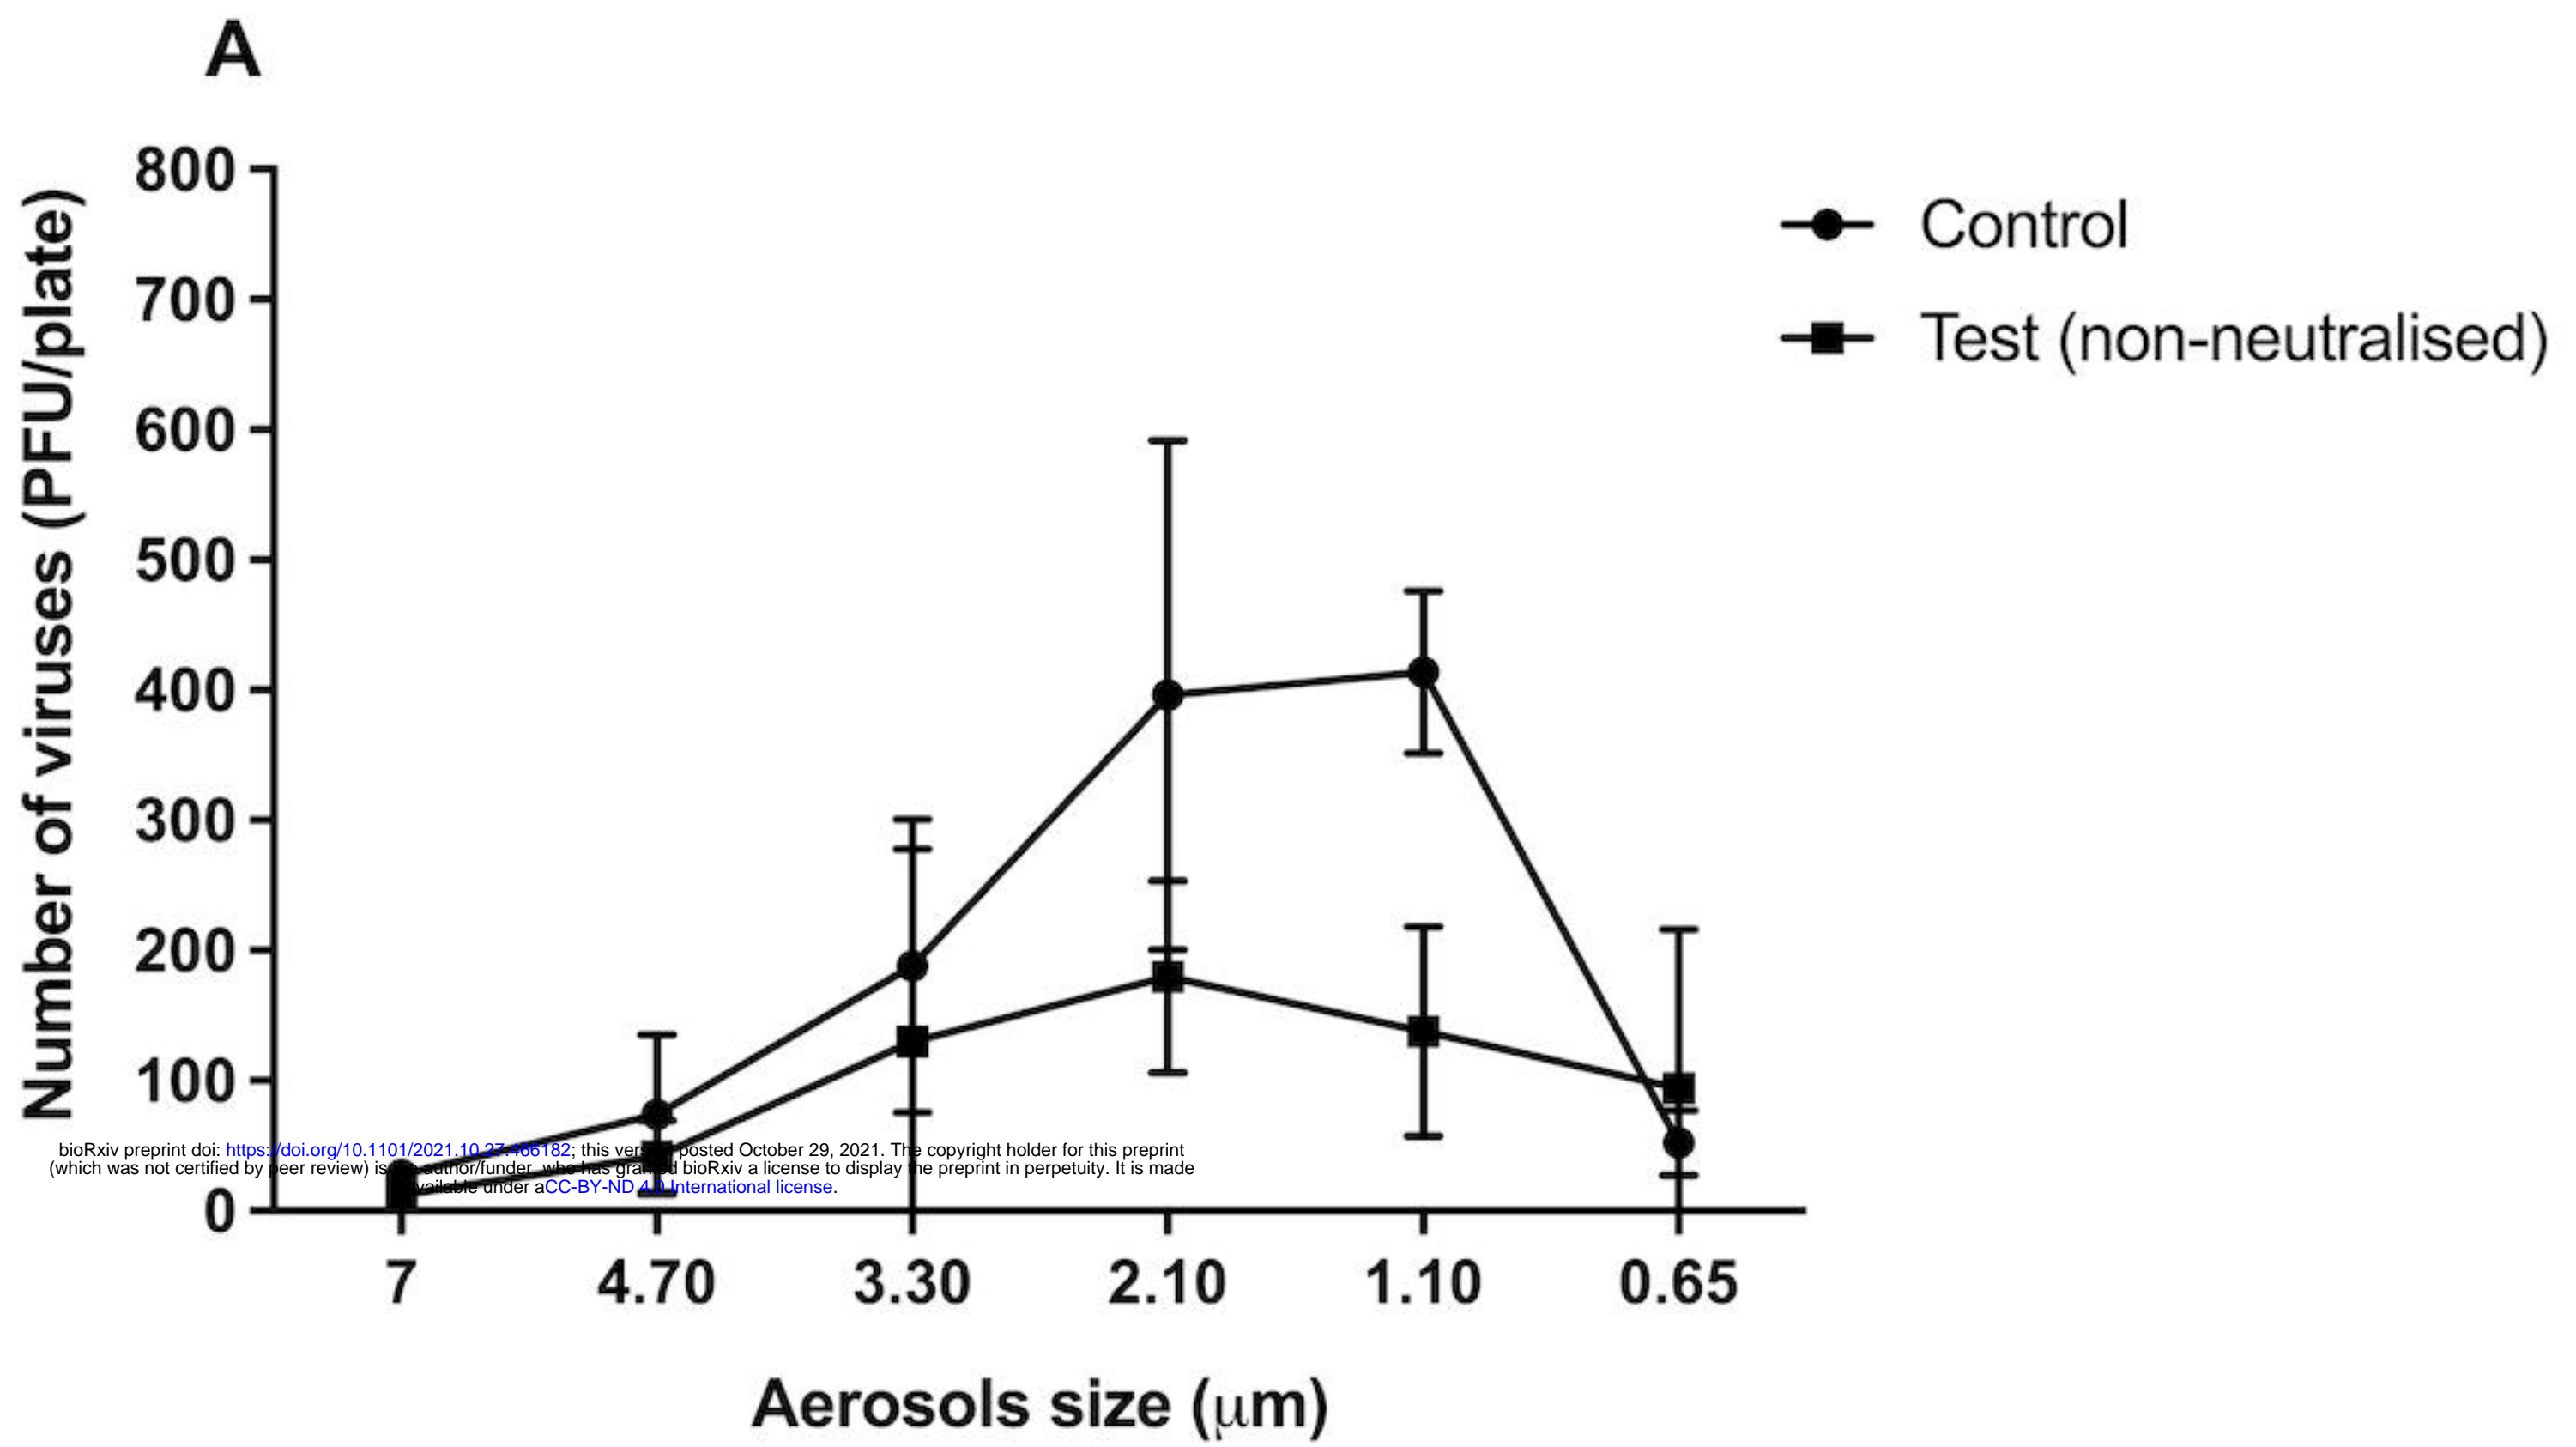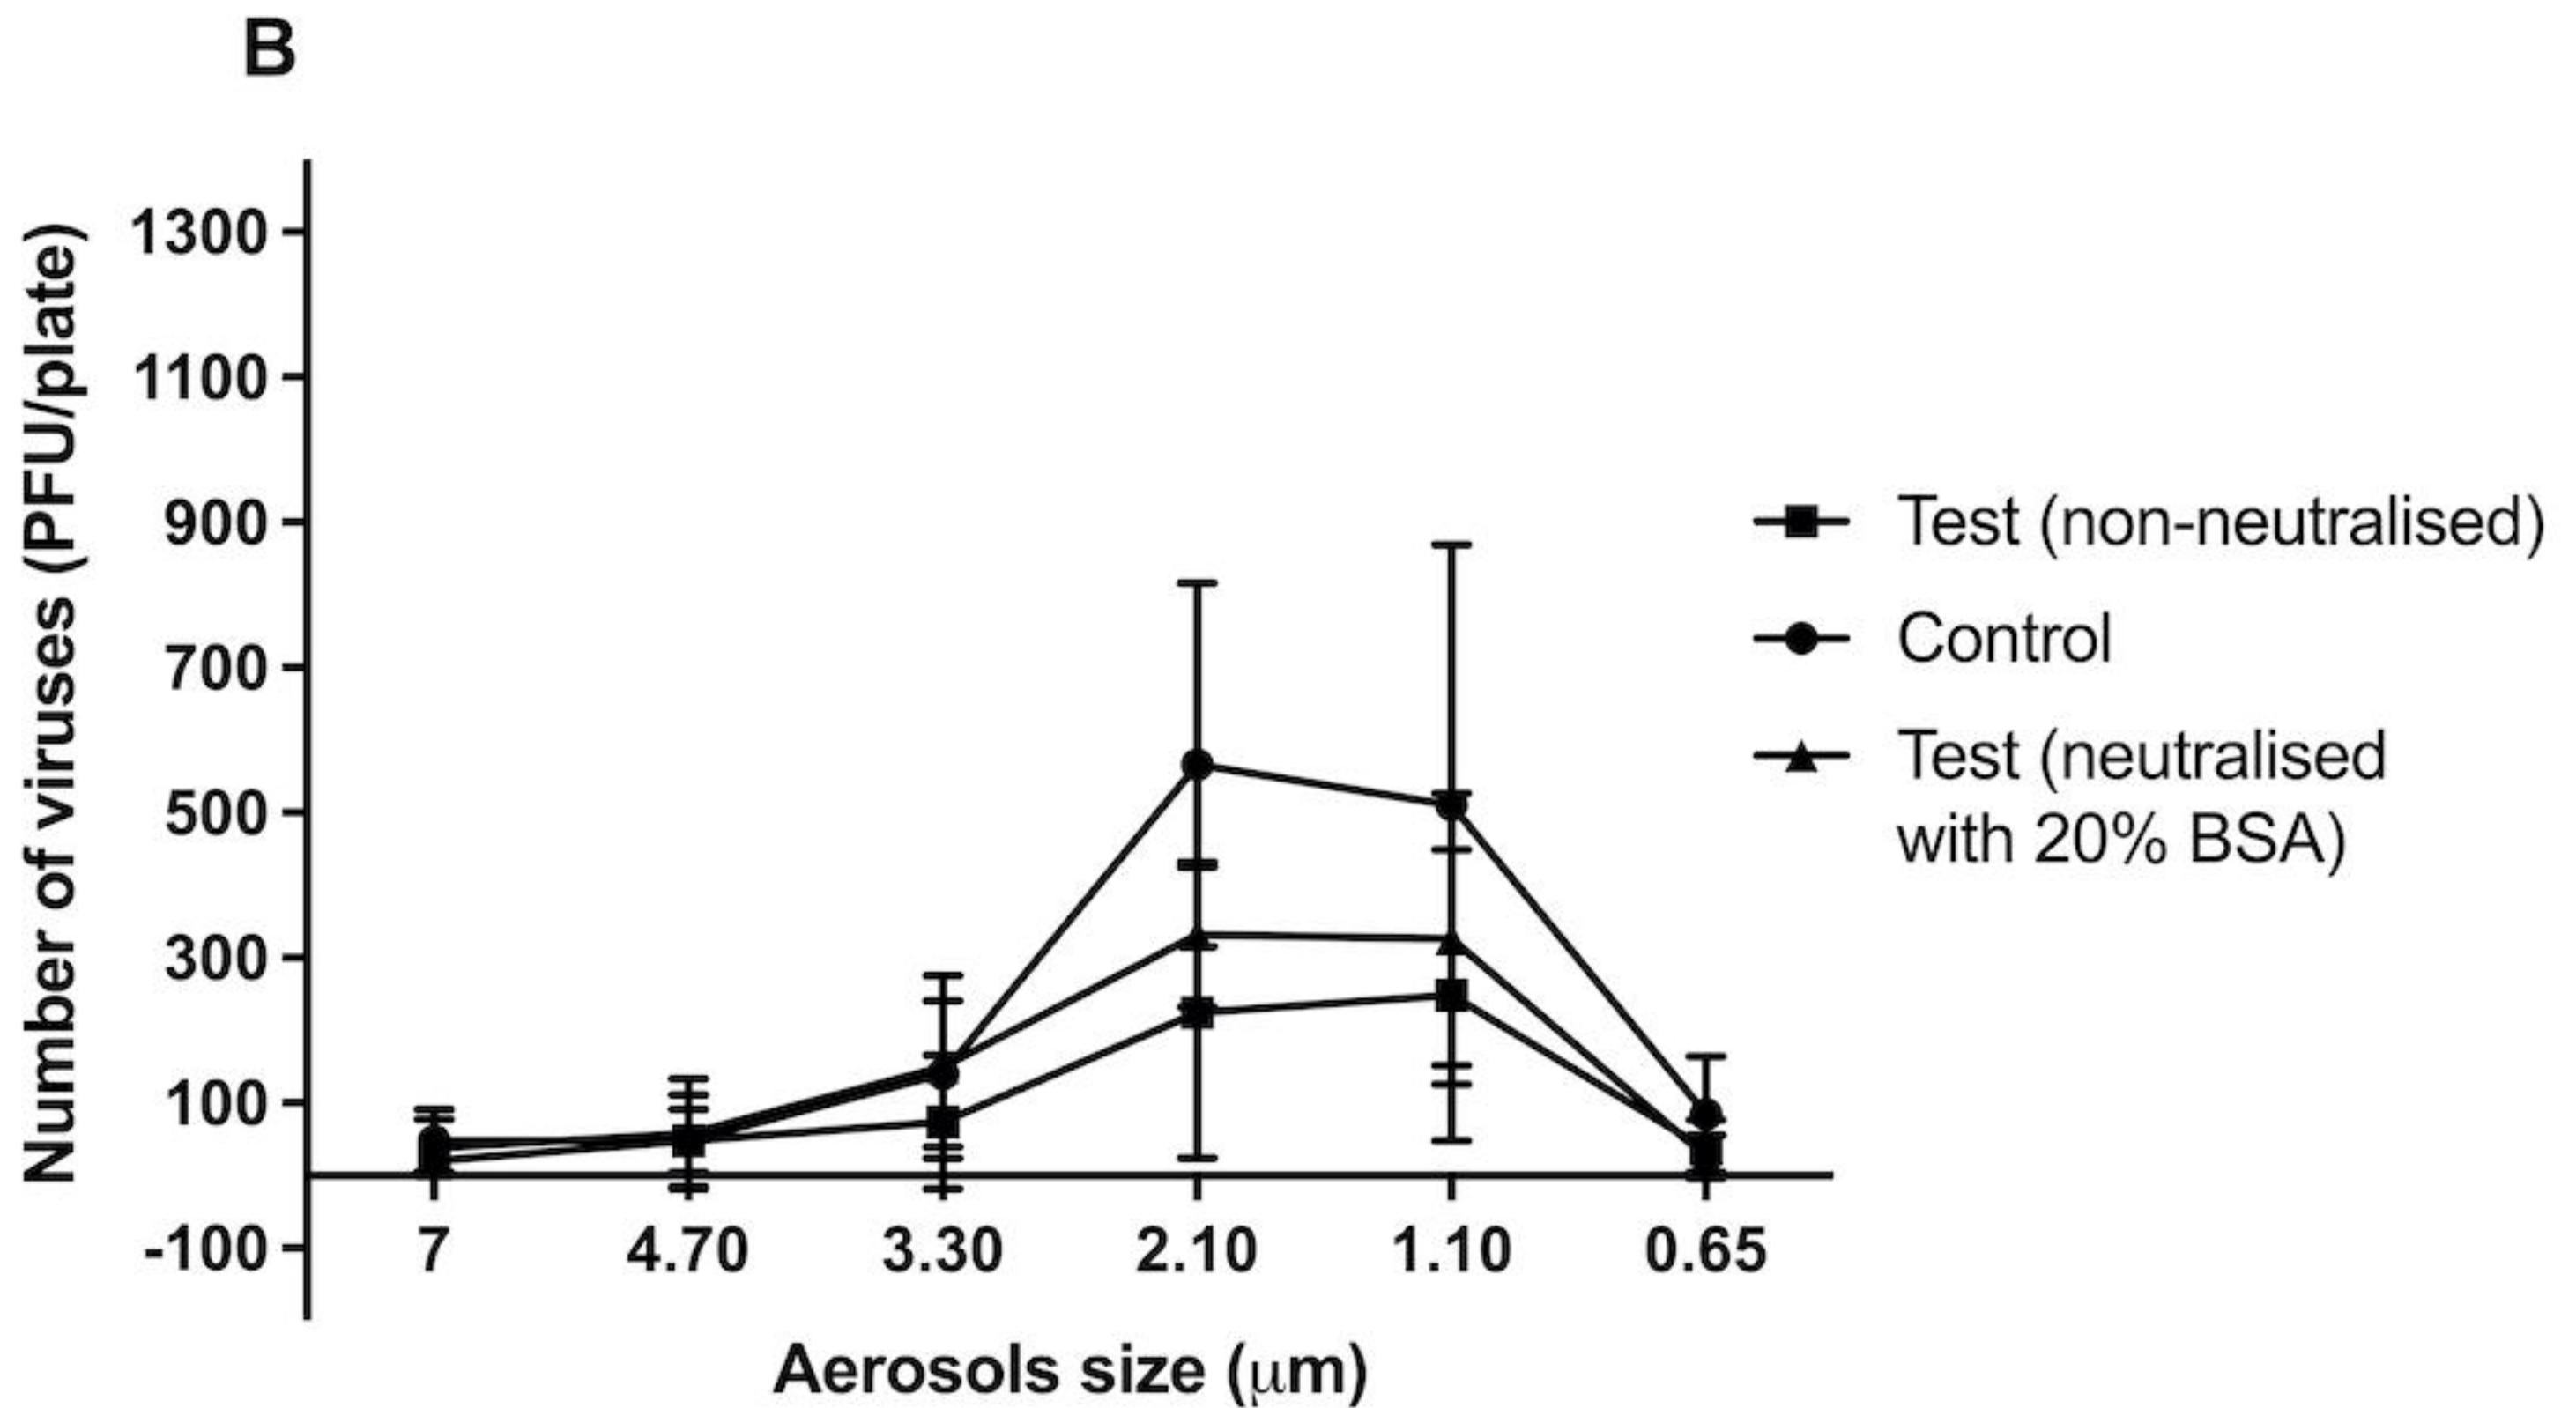



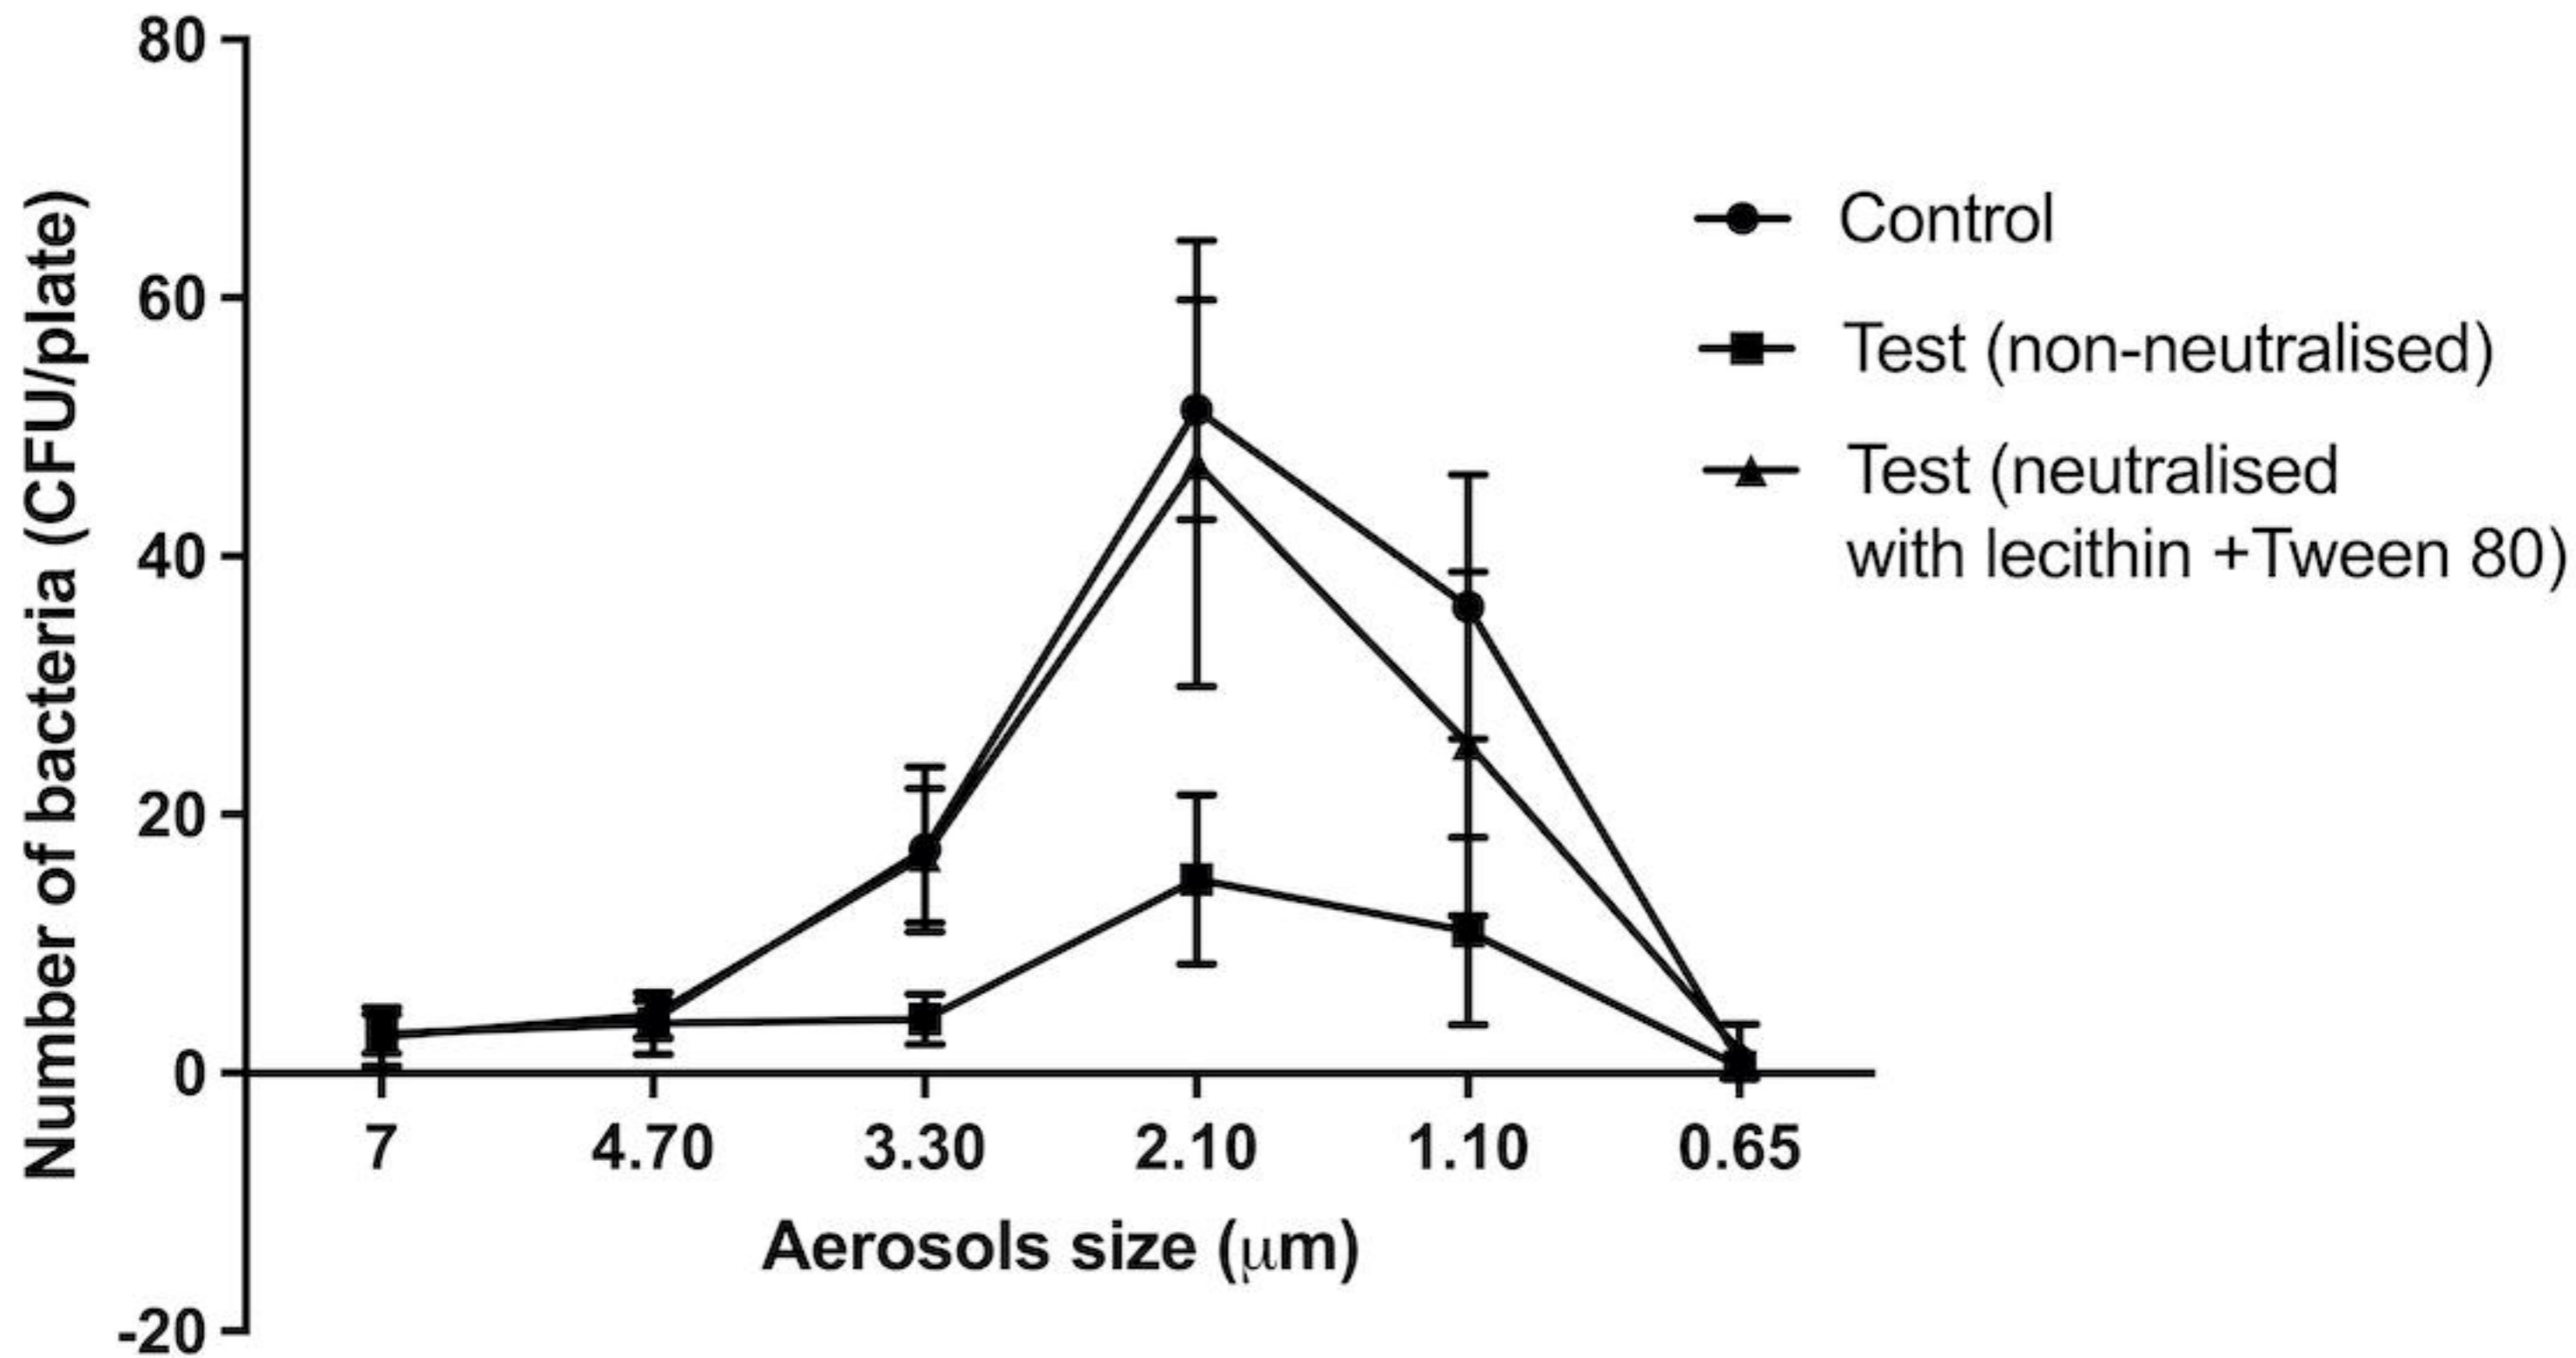

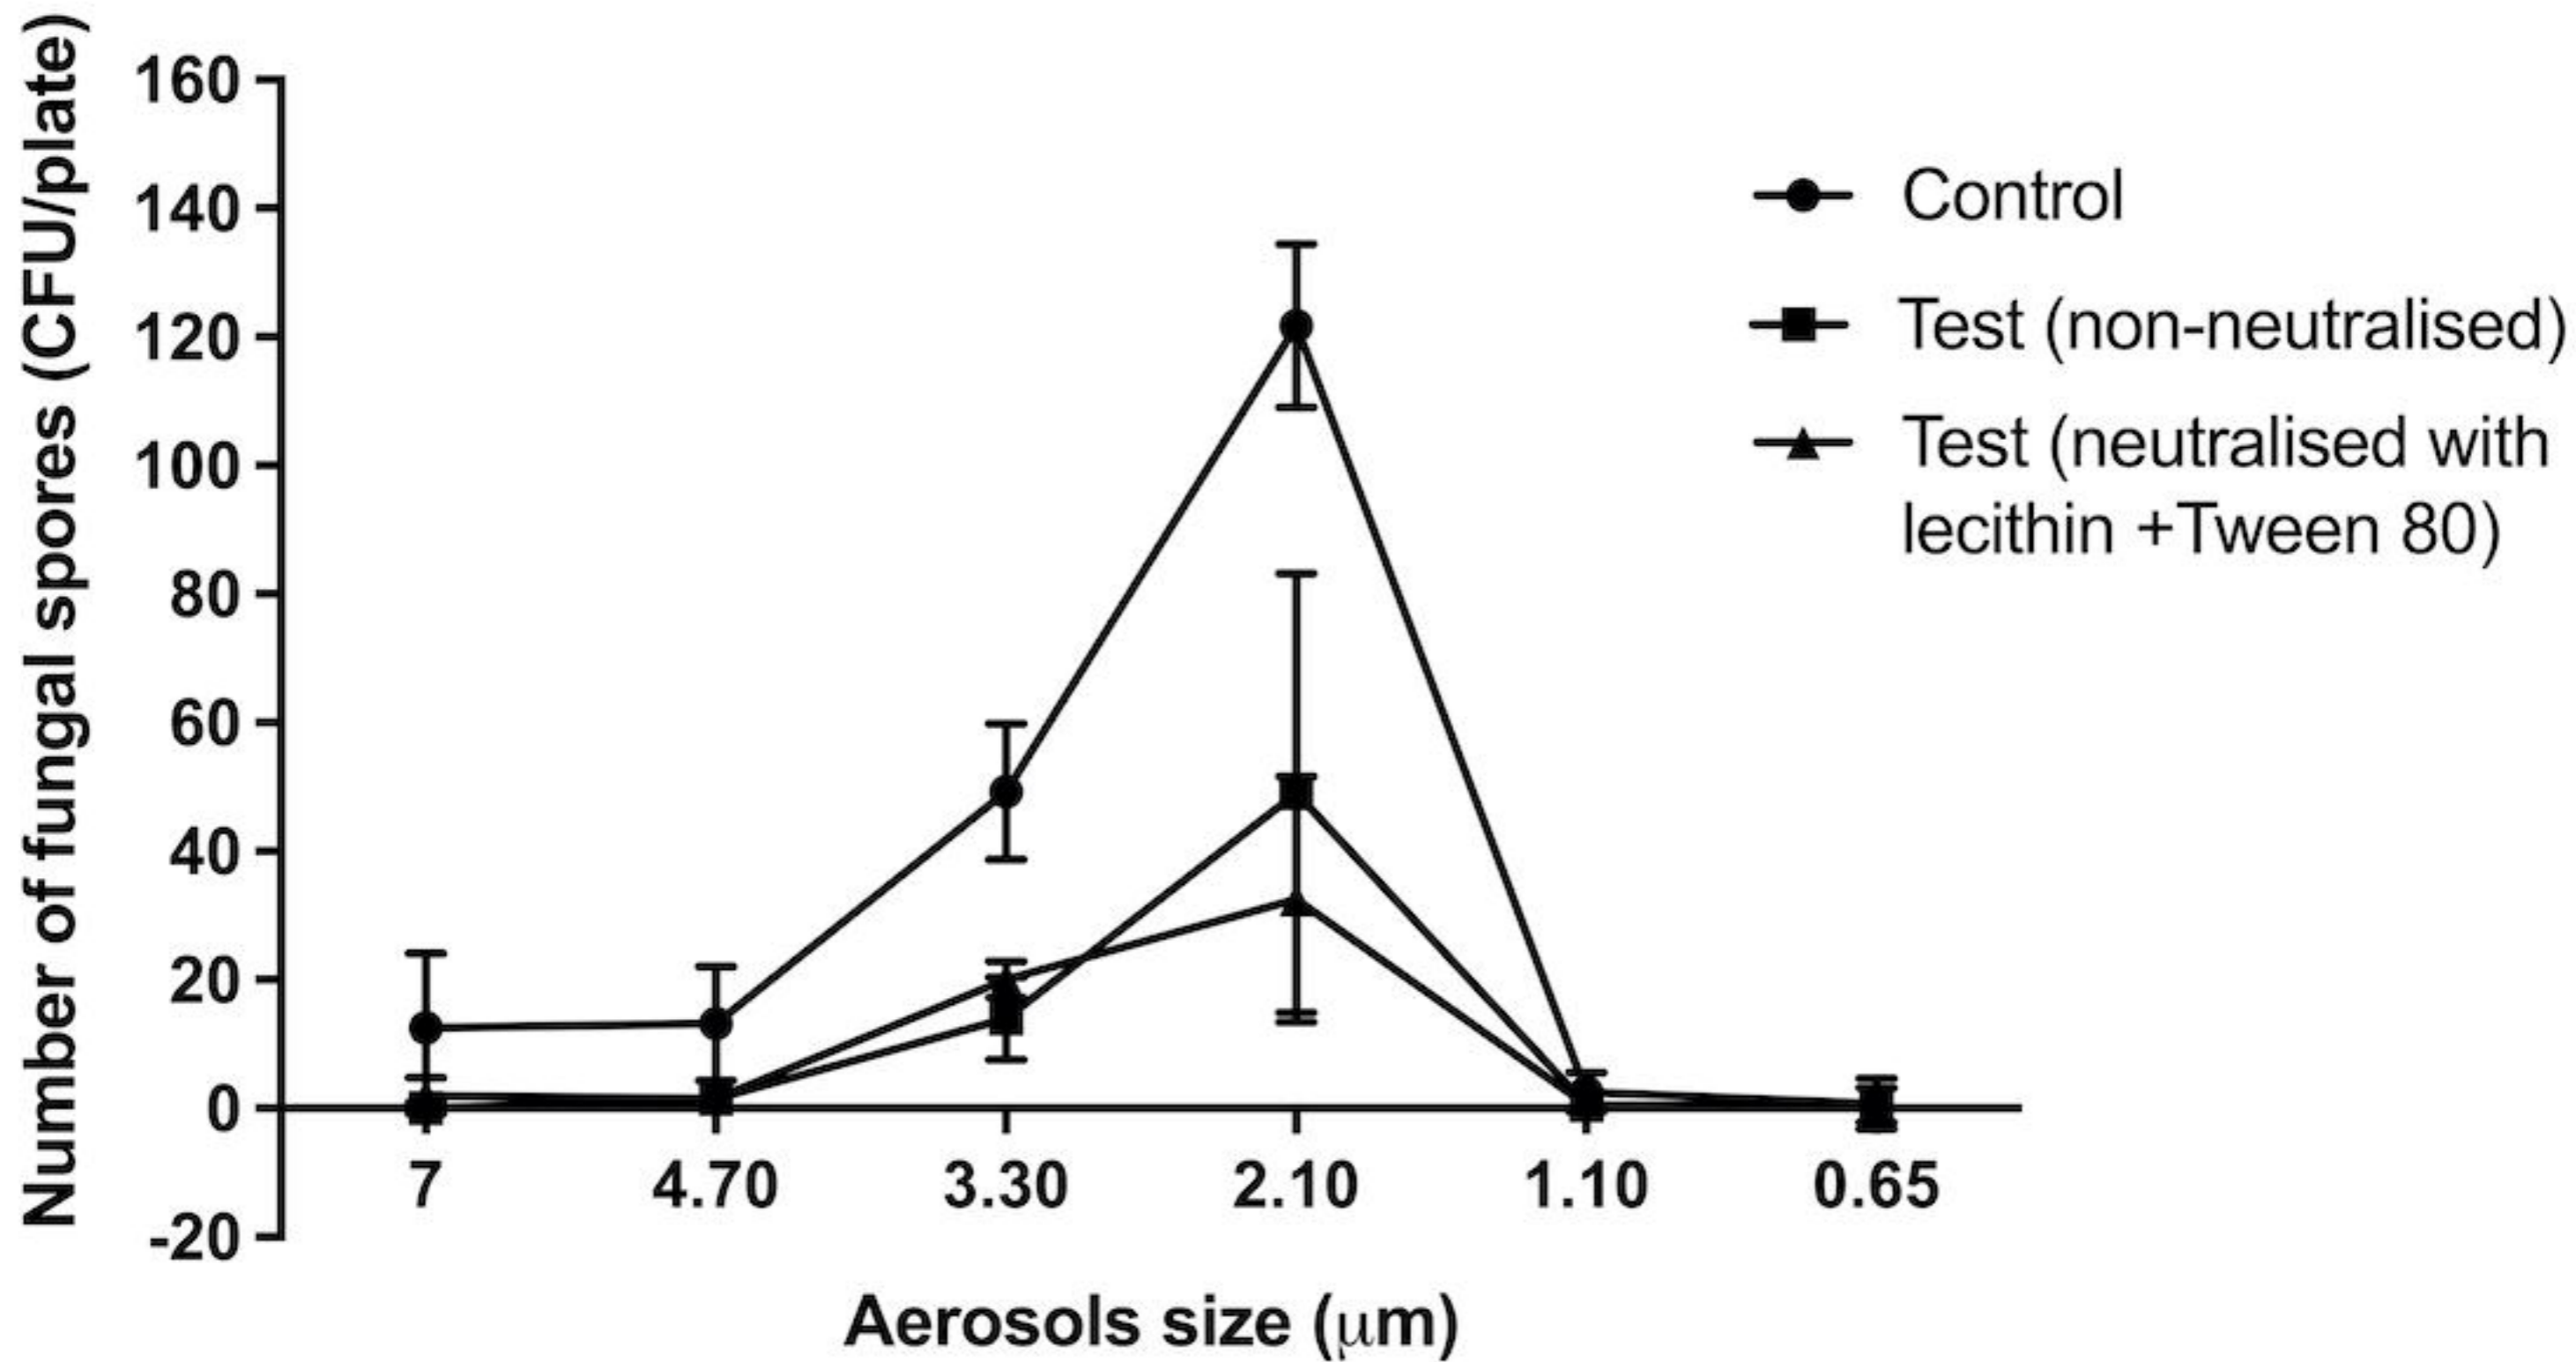

Source: https://www.biorxiv.org/content/biorxiv/early/2021/10/29/2021.10.27.466182.full.pdf
